# Supplementary material for: Purine metabolism regulates DNA repair and therapy resistance in glioblastoma
Source: PubMed Central journal article supplement (PMC7393131; doi:10.1038/s41467-020-17512-x), 2020-07-30
Supplement: 41467_2020_17512_MOESM3_ESM.pdf [file 41467_2020_17512_MOESM3_ESM.pdf]

## **Description of Additional Supplementary Files**

File Name: Supplementary Data 1

Description: The metabolomic data of Fig. 1c-e.

File Name: Supplementary Data 2

Description: The metabolomic data of Fig. 3b-d, Fig. 6b and Supplementary Fig. 5b-f, 6b.
